# Supplementary material
Source: HighWire-hosted journal article supplement (http://molpharm.aspetjournals.org/highwire/filestream/77067/field_highwire_adjunct_files/0/Supplemental_figure_1.pdf)
Supplement: Supplemental_figure_1.pdf [file Supplemental_figure_1.pdf]

### Crotamine pharmacology revisited: novel insights based on the inhibition of K<sub>v</sub> channels

Steve Peigneur, Diego J. B. Orts, Alvaro R. Prieto da Silva, Nancy Oguiura, Malvina Boni-Mitake, Eduardo B. Oliveira, André J. Zaharenko, Jose C. Freitas, Jan Tytgat  
Molecular Pharmacology

Supplemental figure 1

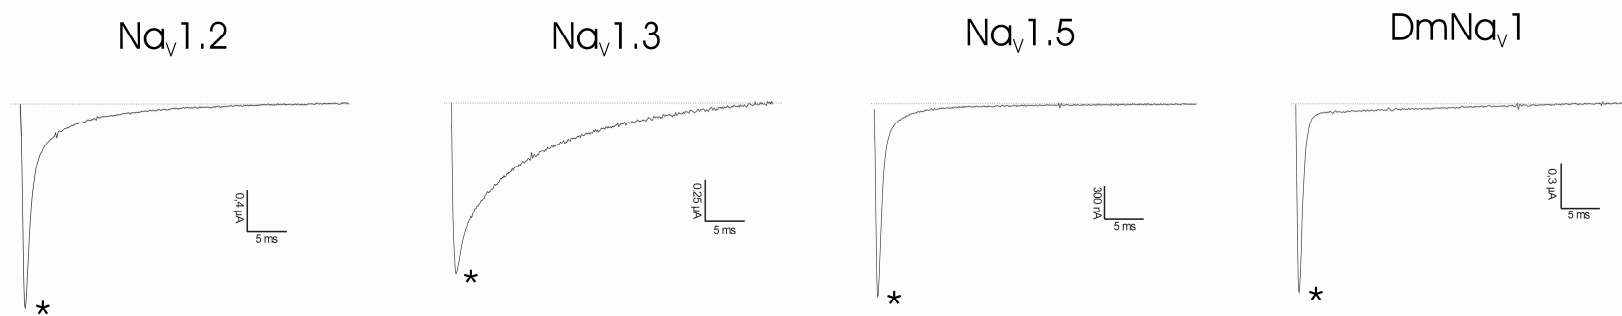

**Supplemental figure 1: Activity of crotamine on Na<sub>v</sub> channels.**

MOL#78188

The current were measured in *X. laevis* oocytes expressing several cloned voltage-gated sodium channel isoforms. Traces shown are representative of at least three independent experiments ( $n \geq 3$ ). The dotted line indicates the zero-current level. The asterisk (\*) distinguishes the steady-state current after application of 3  $\mu\text{M}$  of crotamine.
